# Supplementary material for: A Case-Control Study on the Relationship Between Cholecystectomy and Cholangiocarcinoma in China
Source: Research Square preprint supplement (doi:10.21203/rs.3.rs-136501/v1), 2020-12-30
Supplement: Supplementary file 1 [file 2fd72dab943b04106cdcb669.docx]

**Supplementary Table1.** **Normal distribution test of age.**

|  | **Kolmogorov-Smirnov(K)** | | |
| --- | --- | --- | --- |
| **statistics** | **df** | **p** |
| **Age** | 0.046 | 9744 | **0.000** |

**df: degrees of freedom**
